# Supplementary material for: Born to Cry: A Genetic Dissection of Infant Vocalization
Source: Front Behav Neurosci. 2018 Oct 29;12:250. doi: 10.3389/fnbeh.2018.00250 (PMC6216097; doi:10.3389/fnbeh.2018.00250)
Supplement: Supplementary file 1 [file Table_1.XLSX]

## Sheet: Sheet5
Phenotype	Factor	Degrees of freedom	Sum of squares	Mean sum of squares	F-value	P value	Significance	Proportion of variance explained	Percentage variance explained
Number of calls	Strain	3	615254	205085	26.913	1.76e-12	***	0.106778	10.6778
	Litter_ID	18	1417585	78755	10.335	6.12e-15	***	0.246024	24.6024
	Sex	1	20751	20751	2.723	0.10243		0.00360137	0.360137
	Body_Weight_g	1	24170	24170	3.172	0.07833	.	0.00419475	0.419475
	Age_days	3	66616	22205	2.914	0.03869	*	0.0115613	1.15613
	Strain:Sex	3	33359	11120	1.459	0.2311		0.00578951	0.578951
	Litter_ID:Sex	17	343508	20206	2.652	0.00158	**	0.0596164	5.96164
	Strain:Body_Weight_g	3	36964	12321	1.617	0.19109		0.00641517	0.641517
	Litter_ID:Body_Weight_g	18	441926	24551	3.222	0.00013	***	0.076697	7.6697
	Sex:Body_Weight_g	1	19658	19658	2.58	0.11178		0.00341168	0.341168
	Strain:Age_days	9	109225	12136	1.593	0.12958		0.0189562	1.89562
	Litter_ID:Age_days	54	744490	13787	1.809	0.0065	**	0.129208	12.9208
	Sex:Age_days	3	2028	676	0.089	0.96608		0.000351963	0.0351963
	Body_Weight_g:Age_days	3	6531	2177	0.286	0.83561		0.00113347	0.113347
	Strain:Sex:Body_Weight_g	3	4218	1406	0.184	0.90669		0.000732041	0.0732041
	Litter_ID:Sex:Body_Weight_g	17	265111	15595	2.047	0.01624	*	0.0460105	4.60105
	Strain:Sex:Age_days	9	70593	7844	1.029	0.42326		0.0122515	1.22515
	Litter_ID:Sex:Age_days	47	312281	6644	0.872	0.69327		0.0541969	5.41969
	Strain:Body_Weight_g:Age_days	9	71835	7982	1.047	0.40949		0.0124671	1.24671
	Litter_ID:Body_Weight_g:Age_days	53	188427	3555	0.467	0.9984		0.0327018	3.27018
	Sex:Body_Weight_g:Age_days	3	25429	8476	1.112	0.34843		0.00441325	0.441325
	Strain:Sex:Body_Weight_g:Age_days	9	108668	12074	1.584	0.13205		0.0188595	1.88595
	Litter_ID:Sex:Body_Weight_g:Age_days	31	155143	5005	0.657	0.9068		0.0269253	2.69253
	Residuals	89	678199	7620				0.117703	11.7703
Mean duration of calls	Strain	3	0.020505	0.006835	269.045	< 0.0000000000000002	***	0.512753	51.2753
	Litter_ID	18	0.003849	0.000214	8.418	1.38e-12	***	0.0962491	9.62491
	Sex	1	3.7e-05	3.7e-05	1.462	0.22983		0.000925231	0.0925231
	Body_Weight_g	1	7.5e-05	7.5e-05	2.958	0.08893	.	0.00187547	0.187547
	Age_days	3	0.00032	0.000107	4.202	0.0079	**	0.008002	0.8002
	Strain:Sex	3	0.000377	0.000126	4.94	0.00321	**	0.00942736	0.942736
	Litter_ID:Sex	17	0.002534	0.000149	5.868	9.31e-09	***	0.0633658	6.33658
	Strain:Body_Weight_g	3	0.000179	6e-05	2.35	0.07776	.	0.00447612	0.447612
	Litter_ID:Body_Weight_g	18	0.001922	0.000107	4.203	2.61e-06	***	0.048062	4.8062
	Sex:Body_Weight_g	1	5.4e-05	5.4e-05	2.112	0.14965		0.00135034	0.135034
	Strain:Age_days	9	0.000417	4.6e-05	1.826	0.07436	.	0.0104276	1.04276
	Litter_ID:Age_days	54	0.00211	3.9e-05	1.538	0.03565	*	0.0527632	5.27632
	Sex:Age_days	3	9.5e-05	3.2e-05	1.246	0.29775		0.00237559	0.237559
	Body_Weight_g:Age_days	3	7.2e-05	2.4e-05	0.945	0.42269		0.00180045	0.180045
	Strain:Sex:Body_Weight_g	3	7.5e-05	2.5e-05	0.99	0.40136		0.00187547	0.187547
	Litter_ID:Sex:Body_Weight_g	17	0.000523	3.1e-05	1.211	0.27287		0.0130783	1.30783
	Strain:Sex:Age_days	9	0.000248	2.8e-05	1.083	0.38311		0.00620155	0.620155
	Litter_ID:Sex:Age_days	47	0.001146	2.4e-05	0.96	0.55352		0.0286572	2.86572
	Strain:Body_Weight_g:Age_days	9	0.00026	2.9e-05	1.137	0.34556		0.00650163	0.650163
	Litter_ID:Body_Weight_g:Age_days	53	0.001525	2.9e-05	1.133	0.29808		0.0381345	3.81345
	Sex:Body_Weight_g:Age_days	3	6e-06	2e-06	0.072	0.97464		0.000150038	0.0150038
	Strain:Sex:Body_Weight_g:Age_days	9	0.000299	3.3e-05	1.308	0.24407		0.00747687	0.747687
	Litter_ID:Sex:Body_Weight_g:Age_days	31	0.001101	3.6e-05	1.398	0.11343		0.0275319	2.75319
	Residuals	89	0.002261	2.5e-05				0.0565391	5.65391
Mean frequency of calls	Strain	3	4353000000	1451000000	51.997	< 0.0000000000000002	***	0.164998	16.4998
	Litter_ID	18	6092000000	338400000	12.128	< 0.0000000000000002	***	0.230913	23.0913
	Sex	1	54840000	54840000	1.965	0.164445		0.00207867	0.207867
	Body_Weight_g	1	78690000	78690000	2.82	0.096618	.	0.00298269	0.298269
	Age_days	3	206100000	68710000	2.462	0.067696	.	0.00781209	0.781209
	Strain:Sex	3	61950000	20650000	0.74	0.530961		0.00234817	0.234817
	Litter_ID:Sex	17	673700000	39630000	1.42	0.146182		0.0255362	2.55362
	Strain:Body_Weight_g	3	243000000	80990000	2.902	0.039256	*	0.00921076	0.921076
	Litter_ID:Body_Weight_g	18	1077000000	59830000	2.144	0.010003	*	0.040823	4.0823
	Sex:Body_Weight_g	1	58560000	58560000	2.099	0.150949		0.00221968	0.221968
	Strain:Age_days	9	882600000	98060000	3.514	0.000922	***	0.0334544	3.34544
	Litter_ID:Age_days	54	2042000000	37820000	1.355	0.101201		0.0774007	7.74007
	Sex:Age_days	3	1014000000	338100000	12.117	1.01e-06	***	0.038435	3.8435
	Body_Weight_g:Age_days	3	247100000	82380000	2.952	0.036909	*	0.00936616	0.936616
	Strain:Sex:Body_Weight_g	3	314600000	104900000	3.758	0.013633	*	0.0119247	1.19247
	Litter_ID:Sex:Body_Weight_g	17	1378000000	81040000	2.904	0.000586	***	0.0522322	5.22322
	Strain:Sex:Age_days	9	542500000	60280000	2.16	0.032314	*	0.0205631	2.05631
	Litter_ID:Sex:Age_days	47	1295000000	27550000	0.987	0.50952		0.0490861	4.90861
	Strain:Body_Weight_g:Age_days	9	279700000	31080000	1.114	0.361462		0.0106018	1.06018
	Litter_ID:Body_Weight_g:Age_days	53	1521000000	28690000	1.028	0.446833		0.0576525	5.76525
	Sex:Body_Weight_g:Age_days	3	65960000	21990000	0.788	0.503811		0.00250017	0.250017
	Strain:Sex:Body_Weight_g:Age_days	9	626400000	69600000	2.494	0.013656	*	0.0237433	2.37433
	Litter_ID:Sex:Body_Weight_g:Age_days	31	790500000	25500000	0.914	0.600374		0.0299634	2.99634
	Residuals	89	2484000000	27910000				0.0941544	9.41544
Mean peak amplitude of calls	Strain	3	18291	6097	304.633	< 0.0000000000000002	***	0.30808	30.808
	Litter_ID	18	30279	1682	84.049	< 0.0000000000000002	***	0.509996	50.9996
	Sex	1	158	158	7.881	0.006138	**	0.00266123	0.266123
	Body_Weight_g	1	4	4	0.224	0.63746		6.7373e-05	0.0067373
	Age_days	3	164	55	2.73	0.048598	*	0.00276229	0.276229
	Strain:Sex	3	239	80	3.981	0.010354	*	0.00402553	0.402553
	Litter_ID:Sex	17	1127	66	3.313	0.000117	***	0.0189823	1.89823
	Strain:Body_Weight_g	3	337	112	5.614	0.001429	**	0.00567617	0.567617
	Litter_ID:Body_Weight_g	18	1197	66	3.322	8.65e-05	***	0.0201614	2.01614
	Sex:Body_Weight_g	1	56	56	2.799	0.097851	.	0.000943221	0.0943221
	Strain:Age_days	9	293	33	1.628	0.119413		0.00493507	0.493507
	Litter_ID:Age_days	54	1429	26	1.322	0.120517		0.024069	2.4069
	Sex:Age_days	3	42	14	0.694	0.557996		0.000707416	0.0707416
	Body_Weight_g:Age_days	3	46	15	0.76	0.519248		0.000774789	0.0774789
	Strain:Sex:Body_Weight_g	3	46	15	0.773	0.51187		0.000774789	0.0774789
	Litter_ID:Sex:Body_Weight_g	17	240	14	0.707	0.788188		0.00404238	0.404238
	Strain:Sex:Age_days	9	39	4	0.214	0.991813		0.000656886	0.0656886
	Litter_ID:Sex:Age_days	47	832	18	0.884	0.673971		0.0140136	1.40136
	Strain:Body_Weight_g:Age_days	9	220	24	1.219	0.293466		0.00370551	0.370551
	Litter_ID:Body_Weight_g:Age_days	53	1332	25	1.255	0.170405		0.0224352	2.24352
	Sex:Body_Weight_g:Age_days	3	24	8	0.395	0.756556		0.000404238	0.0404238
	Strain:Sex:Body_Weight_g:Age_days	9	225	25	1.247	0.277195		0.00378973	0.378973
	Litter_ID:Sex:Body_Weight_g:Age_days	31	970	31	1.563	0.054122	.	0.0163379	1.63379
	Residuals	89	1781	20				0.0299978	2.99978
